# Supplementary material for: Structural evolution of aragonite superstructures obtained in the presence of the siderophore deferoxamine
Source: Royal Society of Chemistry journal article supplement (doi:10.1039/c5ce00186b), 2015-01-01
Supplement: c5ce00186b1.pdf [file c5ce00186b1.pdf]

Supporting info to

**Structural Evolution of Highly Organized Aragonite Superstructures Obtained in the Presence of the Siderophore Deferoxamine under biomimetic conditions**

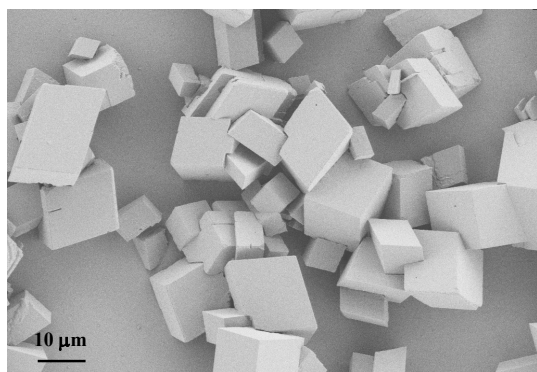

S.I. 1. SEM images of rhombohedral calcite obtained by  $\text{CaCO}_3$  crystallization performed without any additives in a 0.01 M  $\text{CaCl}_2$  solution.

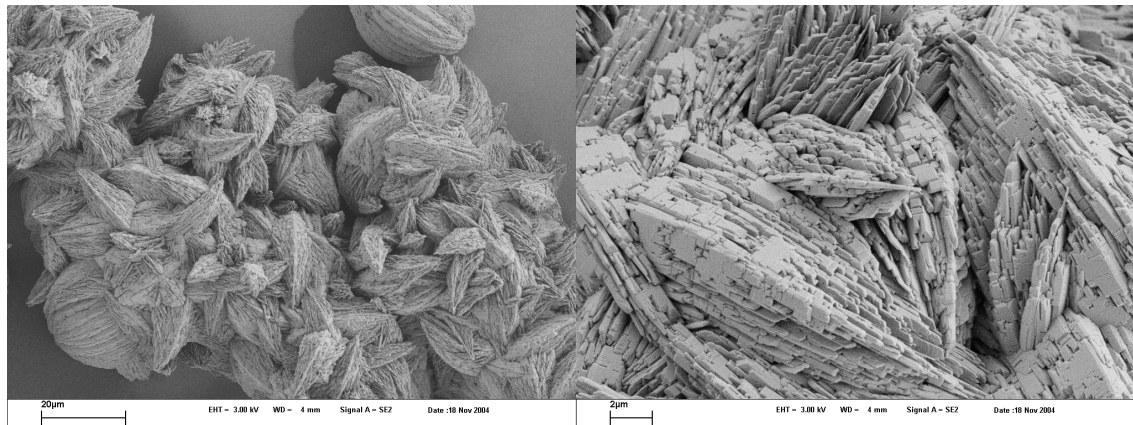

S.I. 2 shows an example for a highly complex intergrowth of the outgrowing structures.

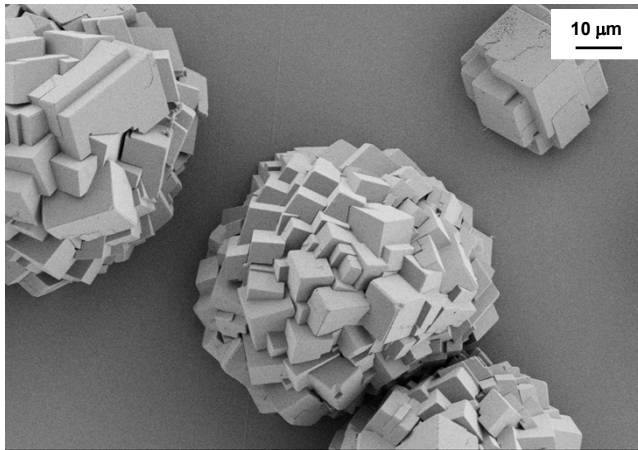

S.I. 3. SEM images of calcium carbonate crystals obtained in the presence of the suberohydroxamic acid (3.2 mg/mL). The predominant morphology are spherical aggregates of rhombohedral calcite.

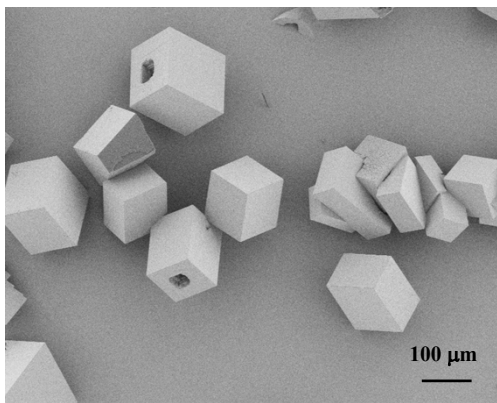

S.I. 4. SEM images showing crystals precipitate with the counter-anion of the commercially available siderophore deferoxamine, the methanesulfonic acid (0.5 mg/mL).
